# Supplementary material
Source: Research Square preprint supplement (doi:10.21203/rs.3.rs-5105527/v1)
Supplement: Supplementary file 1 [file 90fd44fd3641990ce3d6c5c8.xlsx]

## Sheet: Additional File 1.Table 5  
	Table 5 Determinants of neonatal mortality in univariable and multivariable analysis among newborns admitted to neonatal intensive care unit of SPHMMC, Addis Ababa, Ethiopia, 2023 (n=324)
	Variables	Neonatal Outcomes		COR	AOR	P-Value
		Death	Alive	(95% CI)	(95% CI)
		n=108(%)	n=216(%)
	Antenatal Care
	No single Visit	72(66.7%)	55(25.5%)	5.9(3.8-9.7)	12(4.23-15.8)	0.001*
	≥1 ANC Visit	36(33.3%)	161(74.5%)	1	1
	Pregnancy induced hypertension
	Yes	58(17.9%)	33(10.2%)	6.4(3.78-10.9)	1.5(1.61-3.90)	0.001*
	No	50(15.4%)	183(56.5%)	1	1
	Parity
	Primigravida	65(20.8%)	111(35.6%)	1.9(1.2-3.3)	1.8(0.47-6.7)	0.39
	Multigravida	31(9.9%)	105(33.7%)	1	1
	Premature rapture of membrane
	Not detected	100(30.9%)	204(63%)	1.4(0.54-3.43)	0.2(0.02-1.59)	0.13
	Detected	8(2.5%)	12(3.7%)	1	1
	Maternal HIV status
	Reactive	8(2.5%)	32(10.1%)	0.4(0.95-0.99)	1.56(0.26-9.3)	0.62
	Non-reactive	100(31.6%)	176(55.7%)	1	1
	Antepartum hemorrhage
	Yes	19(5.9%)	1(0.3%)	45(6.05-348.08)	0.04(0.01-1.4)	0.07
	No	89(27.5%)	215(66.4%)	1	1
	Birth weight
	<2500gm	83(25.6%)	42(13%)	13.7(7.86-24.0)	11.7(5.6-25.6)	0.001*
	≥2500gm	25(7.7%)	174(53.7%)	1	1
	Gestational Age
	<37Weeks	80(24.7%)	61(18.8%)	7.3(4.30-12.0)	4.2(1.4-12.6)	0.009*
	≥37weeks	28(8.6%)	155(47.8%)	1	1
	Fetal Malpresentation
	Yes	77(23.8%)	53(16.45)	0.1(0.07-0.22)	2.1(1.05-2.6)	0.003*
	No	31(9.6%)	163(50.3%)	1	1
	Sepsis
	Yes	14(4.3%)	54(16.7%)	0.4(0.24-0.85)	3.9(0.68-23)	0.13
	No	94(29%)	162(50%)	1	1
	Perinatal asphyxia
	Yes	24(7.4%)	12(3.7%)	4.9(2.3-10.2)	0.4(0.05-3.3)	0.39
	No	84(25.9%)	204(63%)	1	1
	Congenital Malformation
	Yes	3(0.9%)	5(1.5%)	1.2(0.28-5.1)	1.1(0.02-50)	0.95
	No	105(32.4%)	211(65.1%)	1	1
	Respiratory Distress Syndrome
	Yes	59(18.2%)	64(19.8%)	3(1.78-4.6)	0.5(0.12-1.8)	0.27
	No	49(15.1%)	152(46.9%)	1	1
	CPAP Therapy
	Not used	82(25.3%)	82(25.3%)	5(3.06-8.7)	2.7(0.95-7.6)	0.06
	Used	26(8%)	134(41.4%)	1	1
	Mode of delivery
	Instrument	37(11.4%)	33(10.2%)	1.9(1.1-3.5)	3.7(0.75-18.4)	0.1
	Cesarean section	12(3.7%)	81(25%)	0.3(0.13-0.5)	3.4(0.58-20.5)	0.17
	Spontaneous	59(18.2%)	102(31.5%)	1	1
	Place of delivery
	Home	50(15.4%)	16(4.9%)	10.7(5.7-20.3)	8(4.2-19.4)	0.001*
	Facility	58(17.9%)	200(61.7%)	1	1
	AOR, Adjusted Odd Ratio, CI, Confidence Interval; COR, crude odds ratio.*Significant at P<0.05
